# Supplementary material for: Expression of key regulatory genes in necroptosis and its effect on the prognosis in non-small cell lung cancer
Source: PubMed Central journal article supplement (PMC7391199; doi:10.7150/jca.46172), 2020-07-11
Supplement: jcav11p5503s1.pdf [file jcav11p5503s1.pdf]

Supplementary Table 1. Association between clinical characteristics and the expression level of key necroptotic genes in normal lung tissues of 253 patients.

| Variables        | No of patients | RIPK1      |            |                    | RIPK3      |            |                    | MLKL       |            |                    |
|------------------|----------------|------------|------------|--------------------|------------|------------|--------------------|------------|------------|--------------------|
|                  |                | Low        | High       | <i>P</i>           | Low        | High       | <i>P</i>           | Low        | High       | <i>P</i>           |
| Age              |                | 64.9(±8.7) | 64.0(±9.7) | 0.42               | 64.1(±9.6) | 64.9(±8.7) | 0.49               | 65.0(±9.6) | 64.0(±8.7) | 0.38               |
| Gender           |                |            |            |                    |            |            |                    |            |            |                    |
| Male             | 173            | 81(46.8)   | 92(53.2)   | 0.03               | 77(44.5)   | 96(55.5)   | 1×10 <sup>-3</sup> | 76(43.9)   | 97(56.1)   | 2×10 <sup>-3</sup> |
| Female           | 80             | 49(61.2)   | 31(38.8)   |                    | 53(66.2)   | 27(33.8)   |                    | 52(65.0)   | 28(35.0)   |                    |
| Smoking status   |                |            |            |                    |            |            |                    |            |            |                    |
| Smoker           | 168            | 75(44.6)   | 93(55.4)   | 3×10 <sup>-3</sup> | 69(41.1)   | 99(58.9)   | 4×10 <sup>-6</sup> | 72(42.9)   | 96(57.1)   | 1×10 <sup>-3</sup> |
| Non-smoker       | 85             | 55(64.7)   | 30(35.3)   |                    | 61(71.8)   | 24(28.2)   |                    | 56(65.9)   | 29(34.1)   |                    |
| Histologic type  |                |            |            |                    |            |            |                    |            |            |                    |
| SCC              | 96             | 35(36.5)   | 61(63.5)   | 2×10 <sup>-4</sup> | 28(29.2)   | 68(70.8)   | 3×10 <sup>-8</sup> | 30(31.2)   | 66(68.8)   | 1×10 <sup>-6</sup> |
| AC               | 157            | 95(60.5)   | 62(39.5)   |                    | 102(65.0)  | 55(35.0)   |                    | 98(62.4)   | 59(37.6)   |                    |
| Smoker           | 74             | 40(54.1)   | 34(45.9)   | 0.12               | 42(56.8)   | 32(43.2)   | 0.04               | 42(56.8)   | 32(43.2)   | 0.17               |
| Non-smoker       | 83             | 55(66.3)   | 28(33.7)   |                    | 60(72.3)   | 23(27.7)   |                    | 56(67.5)   | 27(32.5)   |                    |
| EGFR mutant      | 45             | 28(62.2)   | 17(37.8)   | 0.67               | 29(64.4)   | 16(35.6)   | 0.93               | 28(62.2)   | 17(37.8)   | 0.94               |
| EGFR wild        | 89             | 52(58.4)   | 37(41.6)   |                    | 58(65.2)   | 31(34.8)   |                    | 56(62.9)   | 33(37.1)   |                    |
| Pathologic stage |                |            |            |                    |            |            |                    |            |            |                    |
| Stage I          | 210            | 104(49.5)  | 106(50.5)  | 0.19               | 103(49.0)  | 107(51.0)  | 0.10               | 100(47.6)  | 110(52.4)  | 0.04               |
| Stage II-III     | 43             | 26(60.5)   | 17(39.5)   |                    | 27(62.8)   | 16(37.2)   |                    | 28(65.1)   | 15(34.9)   |                    |
| Adjuvant CTx     |                |            |            |                    |            |            |                    |            |            |                    |
| Yes              | 52             | 30(57.7)   | 22(42.3)   | 0.31               | 25(48.1)   | 27(51.9)   | 0.59               | 31(59.6)   | 21(40.4)   | 0.14               |
| No               | 201            | 100(49.8)  | 101(50.2)  |                    | 105(52.2)  | 96(47.8)   |                    | 97(48.3)   | 104(51.7)  |                    |

Abbreviations: RIPK1, Receptor-interacting protein kinase 1; RIPK3, Receptor-interacting protein kinase 3; MLKL, Mixed-lineage kinase domain like pseudokinase; SCC, Squamous cell carcinoma; AC, Adenocarcinoma; CTx, Chemotherapy. Data are expressed as the mean (±SD) or number (%).

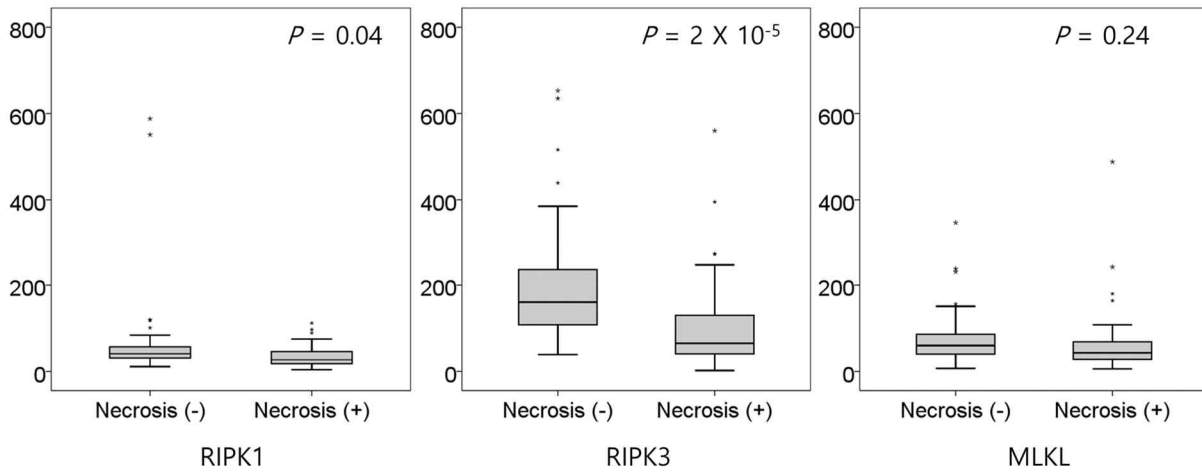

Supplementary Figure 1. Comparison of relative mRNA expression levels of *RIPK1*, *RIPK3*, and *MLKL* in tumors, according to the absence or presence of necrosis in tumors. *P* values by the Student *t*-test.

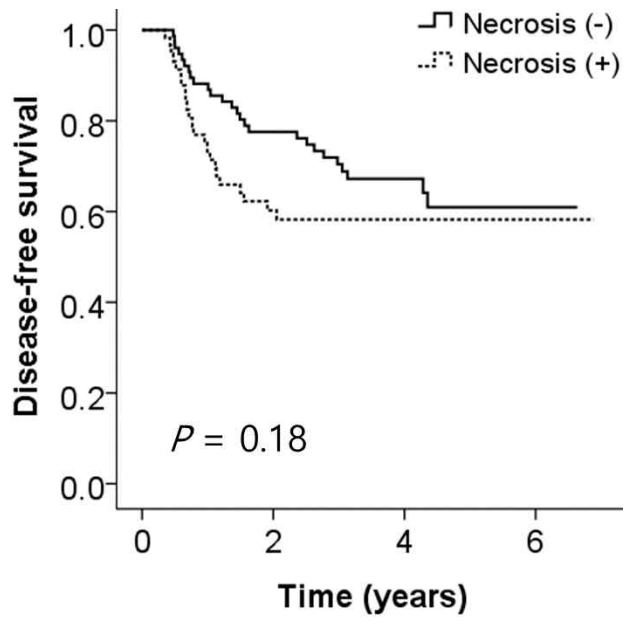

Supplementary Figure 2. Disease-free survival curve according to the absence or presence of tumor necrosis.  $P$  value by log rank test.
